# Supplementary material for: Performance sensitivity analysis of brain metastasis stereotactic radiosurgery outcome prediction using MRI radiomics
Source: PubMed Central journal article supplement (PMC9722896; doi:10.1038/s41598-022-25389-7), 2022-12-05
Supplement: 41598_2022_25389_MOESM1_ESM.pdf [file 41598_2022_25389_MOESM1_ESM.pdf]

# Performance Sensitivity Analysis of Brain Metastasis Stereotactic Radiosurgery Outcome Prediction using MRI Radiomics

## Supplementary Material

**David A. DeVries<sup>1,2,\*</sup>, Frank Lagerwaard<sup>3</sup>, Jaap Zindler<sup>4,5</sup>, Timothy Pok Chi Yeung<sup>6</sup>, George Rodrigues<sup>7</sup>, George Hajdok<sup>1</sup>, Aaron D. Ward<sup>1,2</sup>**

<sup>1</sup>Western University, Department of Medical Biophysics, London, N6A 3K7, Canada

<sup>2</sup>Gerald C. Baines Centre, London Health Sciences Centre, London, N6A 5W9, Canada

<sup>3</sup>Amsterdam University Medical Centre, Department of Radiation Oncology, Amsterdam, 1081, The Netherlands

<sup>4</sup>Haaglanden Medical Centre, Department of Radiation Oncology, Den Hague, 2512VA, The Netherlands

<sup>5</sup>Holland Proton Centre, Delft, 2629JA, The Netherlands

<sup>6</sup>RefleXion Medical, Hayward, 94545, USA

<sup>7</sup>Western University, Department of Oncology, London, N6A 3K7, Canada

\*ddevrie8@uwo.ca

**Table S1.** Complete catalogue of the 119 features included within the study. The number for each feature is the “Feature Look-up Number” used elsewhere such as Figure S2 and Table S3. All features not with feature type “Clinical” are radiomic features computed from the pre-treatment T1w-CE MRI, with complete documentation of the features provided by the PyRadiomics project (<https://pyradiomics.readthedocs.io/en/latest/features.html>). Underlined numbers are only to aid the reader in looking-up feature numbers. Abbreviations: Gray-Level Co-occurrence Matrix (GLCM), Gray-Level Run Length Matrix (GLRLM), Gray-Level Dependence Matrix (GLDM), Gray-Level Size Zone Matrix (GLSZM), Neighbouring Gray Tone Difference Matrix (NGTDM).

| #         | Feature Type | Feature Name                           | #          | Feature Type | Feature Name                              |
|-----------|--------------|----------------------------------------|------------|--------------|-------------------------------------------|
| 1         | First Order  | 10 <sup>th</sup> Percentile            | 57         | GLRLM        | Gray-Level Non-Uniformity                 |
| 2         | First Order  | 90 <sup>th</sup> Percentile            | 58         | GLRLM        | Gray-Level Non-Uniformity Normalized      |
| 3         | First Order  | Energy                                 | 59         | GLRLM        | Gray-Level Variance                       |
| 4         | First Order  | Entropy                                | <u>60</u>  | GLRLM        | High Gray-Level Run Emphasis              |
| 5         | First Order  | Interquartile Range                    | 61         | GLRLM        | Long Run Emphasis                         |
| 6         | First Order  | Kurtosis                               | 62         | GLRLM        | Long Run High Gray-Level Emphasis         |
| 7         | First Order  | Maximum                                | 63         | GLRLM        | Long Run Low Gray-Level Emphasis          |
| 8         | First Order  | Mean Absolute Deviation                | 64         | GLRLM        | Low Gray-Level Run Emphasis               |
| 9         | First Order  | Mean                                   | 65         | GLRLM        | Run Entropy                               |
| <u>10</u> | First Order  | Median                                 | 66         | GLRLM        | Run Length Non-Uniformity                 |
| 11        | First Order  | Minimum                                | 67         | GLRLM        | Run Length Non-Uniformity Normalized      |
| 12        | First Order  | Range                                  | 68         | GLRLM        | Run Percentage                            |
| 13        | First Order  | Robust Mean Absolute Deviation         | 69         | GLRLM        | Run Variance                              |
| 14        | First Order  | Root Mean Squared                      | <u>70</u>  | GLRLM        | Short Run Emphasis                        |
| 15        | First Order  | Skewness                               | 71         | GLRLM        | Short Run High Gray-Level Emphasis        |
| 16        | First Order  | Total Energy                           | 72         | GLRLM        | Short Run Low Gray-Level Emphasis         |
| 17        | First Order  | Uniformity                             | 73         | GLDM         | Dependence Entropy                        |
| 18        | First Order  | Variance                               | 74         | GLDM         | Dependence Non-Uniformity                 |
| 19        | Shape & Size | Elongation                             | 75         | GLDM         | Dependence Non-Uniformity Normalized      |
| <u>20</u> | Shape & Size | Flatness                               | 76         | GLDM         | Dependence Variance                       |
| 21        | Shape & Size | Least Axis Length                      | 77         | GLDM         | Gray-Level Non-Uniformity                 |
| 22        | Shape & Size | Major Axis Length                      | 78         | GLDM         | Gray-Level Variance                       |
| 23        | Shape & Size | Maximum 2D Diameter Column             | 79         | GLDM         | High Gray-Level Emphasis                  |
| 24        | Shape & Size | Maximum 2D Diameter Row                | <u>80</u>  | GLDM         | Large Dependence Emphasis                 |
| 25        | Shape & Size | Maximum 2D Diameter Slice              | 81         | GLDM         | Large Dependence High Gray-Level Emphasis |
| 26        | Shape & Size | Maximum 3D Diameter                    | 82         | GLDM         | Large Dependence Low Gray-Level Emphasis  |
| 27        | Shape & Size | Mesh Volume                            | 83         | GLDM         | Low Gray-Level Emphasis                   |
| 28        | Shape & Size | Minor Axis Length                      | 84         | GLDM         | Small Dependence Emphasis                 |
| 29        | Shape & Size | Sphericity                             | 85         | GLDM         | Small Dependence High Gray-Level Emphasis |
| <u>30</u> | Shape & Size | Surface Area                           | 86         | GLDM         | Small Dependence Low Gray-Level Emphasis  |
| 31        | Shape & Size | Surface Volume Ratio                   | 87         | GLSZM        | Gray-Level Non-Uniformity                 |
| 32        | Shape & Size | Voxel Volume                           | 88         | GLSZM        | Gray-Level Non-Uniformity Normalized      |
| 33        | GLCM         | Autocorrelation                        | 89         | GLSZM        | Gray-Level Variance                       |
| 34        | GLCM         | Cluster Prominence                     | <u>90</u>  | GLSZM        | High Gray-Level Zone Emphasis             |
| 35        | GLCM         | Cluster Shade                          | 91         | GLSZM        | Large Area Emphasis                       |
| 36        | GLCM         | Cluster Tendency                       | 92         | GLSZM        | Large Area High Gray-Level Emphasis       |
| 37        | GLCM         | Contrast                               | 93         | GLSZM        | Large Area Low Gray-Level Emphasis        |
| 38        | GLCM         | Correlation                            | 94         | GLSZM        | Low Gray-Level Zone Emphasis              |
| 39        | GLCM         | Difference Average                     | 95         | GLSZM        | Size Zone Non-Uniformity                  |
| <u>40</u> | GLCM         | Difference Entropy                     | 96         | GLSZM        | Size Zone Non-Uniformity Normalized       |
| 41        | GLCM         | Difference Variance                    | 97         | GLSZM        | Small Area Emphasis                       |
| 42        | GLCM         | Inverse Difference                     | 98         | GLSZM        | Small Area High Gray-Level Emphasis       |
| 43        | GLCM         | Inverse Difference Moment              | 99         | GLSZM        | Small Area Low Gray-Level Emphasis        |
| 44        | GLCM         | Inverse Difference Moment Normalized   | <u>100</u> | GLSZM        | Zone Entropy                              |
| 45        | GLCM         | Inverse Difference Normalized          | 101        | GLSZM        | Zone Percentage                           |
| 46        | GLCM         | Informational Measure of Correlation 1 | 102        | GLSZM        | Zone Variance                             |
| 47        | GLCM         | Informational Measure of Correlation 2 | 103        | NGTDM        | Busyness                                  |
| 48        | GLCM         | Inverse Variance                       | 104        | NGTDM        | Coarseness                                |
| 49        | GLCM         | Joint Average                          | 105        | NGTDM        | Complexity                                |
| <u>50</u> | GLCM         | Joint Energy                           | 106        | NGTDM        | Contrast                                  |
| 51        | GLCM         | Joint Entropy                          | 107        | NGTDM        | Strength                                  |
| 52        | GLCM         | Maximal Correlation Coefficient        | 108        | Clinical     | Gender                                    |
| 53        | GLCM         | Maximum Probability                    | 109        | Clinical     | Age                                       |
| 54        | GLCM         | Sum Average                            | <u>110</u> | Clinical     | Primary Cancer Active                     |
| 55        | GLCM         | Sum Entropy                            | 111        | Clinical     | Primary Cancer Site                       |
| 56        | GLCM         | Sum Squares                            | 112        | Clinical     | Primary Cancer Histology                  |
|           |              |                                        | 113        | Clinical     | Systemic Metastases Status                |
|           |              |                                        | 114        | Clinical     | Systemic Therapy Status                   |
|           |              |                                        | 115        | Clinical     | Steroid Status                            |
|           |              |                                        | 116        | Clinical     | WHO Score                                 |
|           |              |                                        | 117        | Clinical     | Gross Tumour Volume (GTV) Volume          |
|           |              |                                        | 118        | Clinical     | Brain Metastasis (BM) Location            |
|           |              |                                        | 119        | Clinical     | Dose and Fractionation                    |

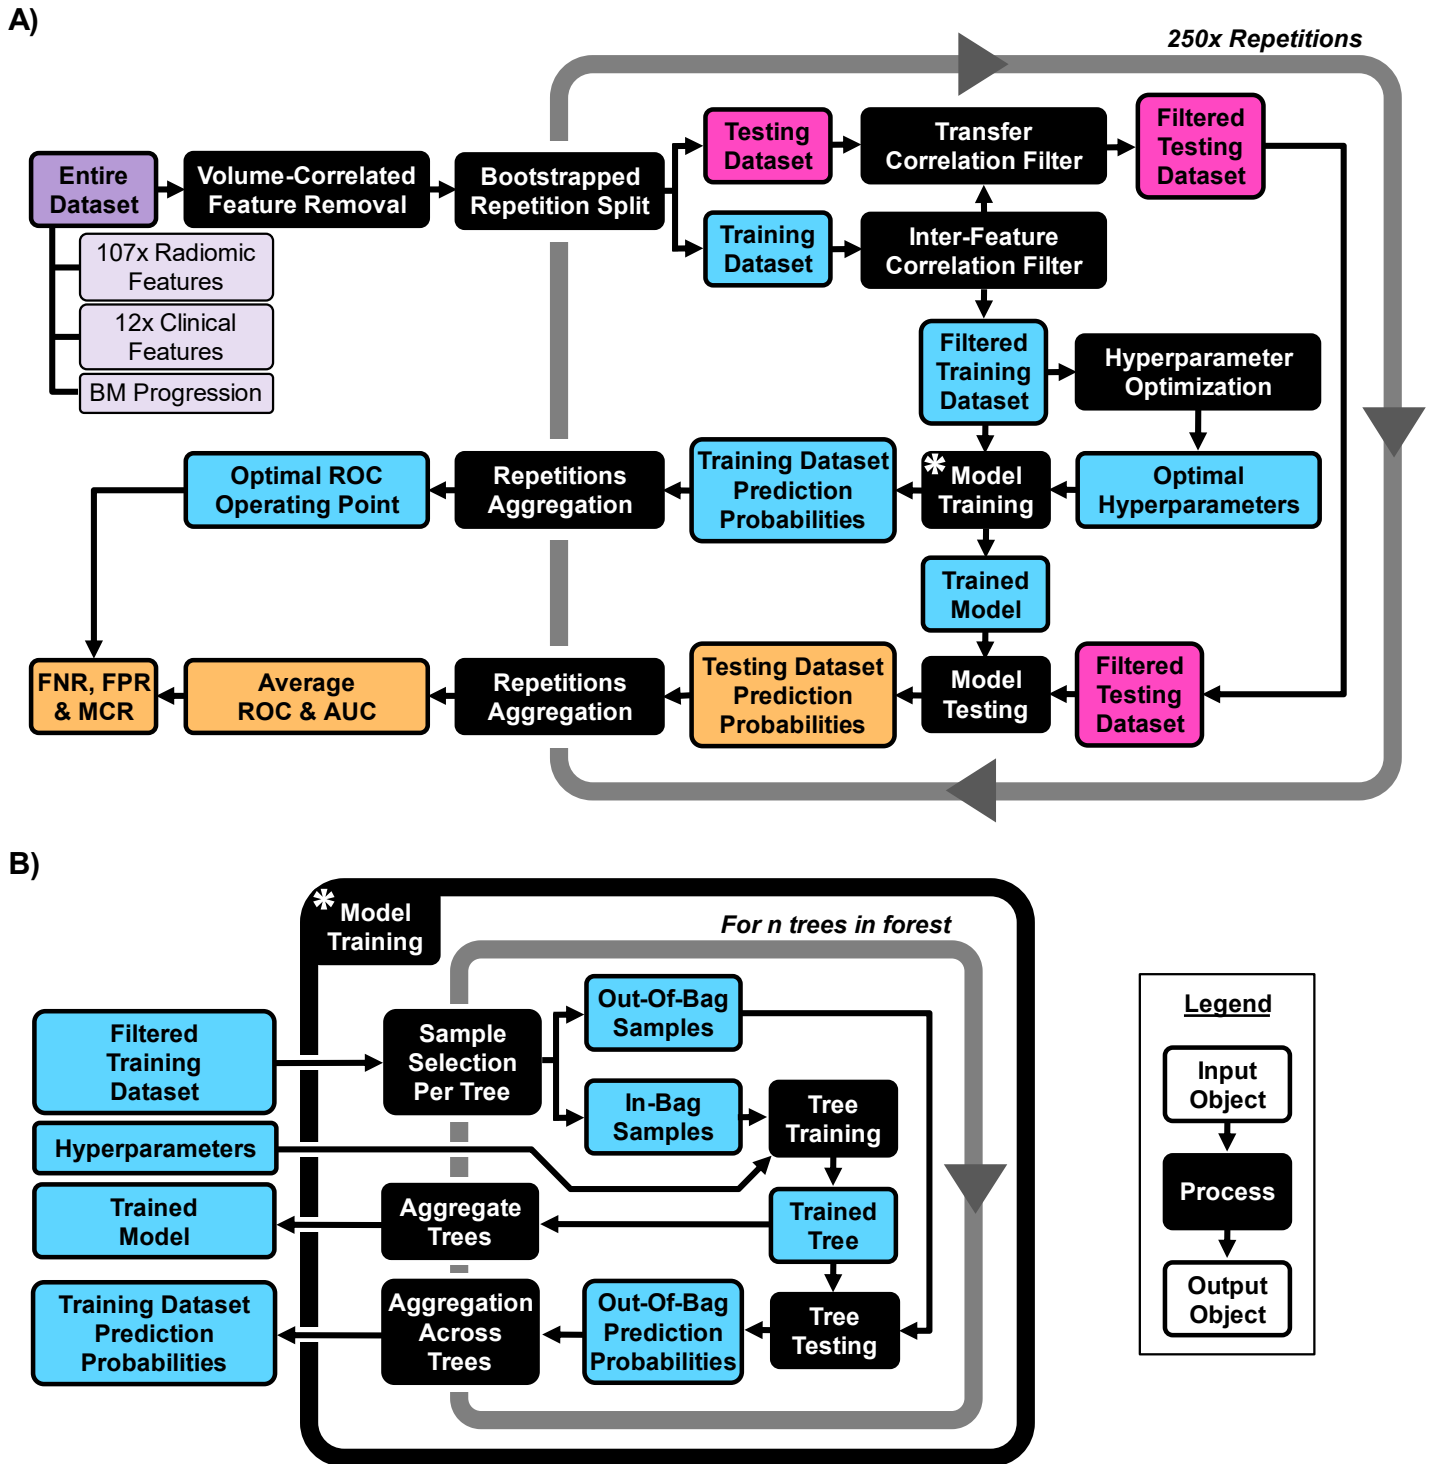

**Figure S1.** Schematic diagram of the machine learning experimental method technique used in the study. A) shows the overall experimental method, while B) provides enhanced detail of the model training to show how the out-of-bag samples from each tree in the random decision forest are used to produce the aggregated training dataset prediction probabilities. The colouring of the objects in the diagram is used to illustrate the separation of the entire dataset into training and testing datasets, the isolation of objects derived from each of the datasets during feature filtering and hyperparameter optimization (to prevent overfitting), and the recombination of objects from the datasets only during model testing and error metrics calculation. The inter-feature correlation filter used hierarchical clustering on the training dataset alone to determine groups of correlated features with a correlation coefficient  $>0.8$ . For each group of correlated features, the feature most strongly correlated to BM progression was retained. This filtering of features was then transferred to the testing dataset, ensuring the testing dataset did not inform the selected features. For the experiments investigating primary cancer site and BM volume effects, the methodology shown would remain identical, except that after the “Repetitions Aggregation” processes shown in A), the training and testing dataset prediction probabilities would be grouped by the associated BMs’ primary cancers and volumes. This would lead to an optimal ROC operating point, and average ROC, AUC, MCR, FNR, and FPR per primary cancer or volume group.

**Table S2.** Hyperparameters for the random decision forest model used. For hyperparameters that underwent optimization, the optimization domain and search transform are provided. Numerical domains are indicated with minimum and maximum values in square brackets. Hyperparameter optimization was performed using 50 iterations of Bayesian optimization using the expected-improvement-plus acquisition function. The AUC on the out-of-bag samples was used as the optimization objective function. For hyperparameters that were not optimized, their value and justification are provided. For further descriptions of the hyperparameters, see the documentation for the *TreeBagger* function provided in Matlab 2019b.

| <b>Hyperparameter</b>              | <b>Optimization Domain</b>       | <b>Optimization Domain Search Transform</b>                                                          |
|------------------------------------|----------------------------------|------------------------------------------------------------------------------------------------------|
| Number of trees                    | [10, 1000]                       | logarithmic                                                                                          |
| Number of features to sample       | [1, number of features]          | linear                                                                                               |
| Minimum leaf size                  | [1, number of features / 2]      | logarithmic                                                                                          |
| Maximum number of decision splits  | [1, number of samples – 1]       | logarithmic                                                                                          |
| Feature selection                  | curvature, interaction curvature | categorical                                                                                          |
| Decision split criterion           | Gini's diversity index, deviance | categorical                                                                                          |
|                                    | <b>Value</b>                     | <b>Justification</b>                                                                                 |
| In-bag fraction                    | 1                                | produces in-bag dataset that is the same size as the training dataset                                |
| Sample with replacement            | on                               | allows for out-of-bag samples to be reserved for evaluating trained model using the training dataset |
| Cost per SRS response              | equal for each response          | false negatives and positives given equal cost                                                       |
| Prior                              | empirical                        | allows priors to be optimized for the study population                                               |
| Algorithm for categorical features | exact                            | all combinations of categories for categorical features investigated at decision splits              |
| Merge leaves                       | off                              | leaf merging not needed as trees are not pruned                                                      |
| Prune                              | off                              | tree pruning not needed as the maximum number of decision splits hyperparameter was optimized        |
| Surrogate decision splits          | 10                               | not all surrogate splits investigated to decrease model training time                                |
| Weights                            | equal for each sample            | all samples given equal importance during training                                                   |

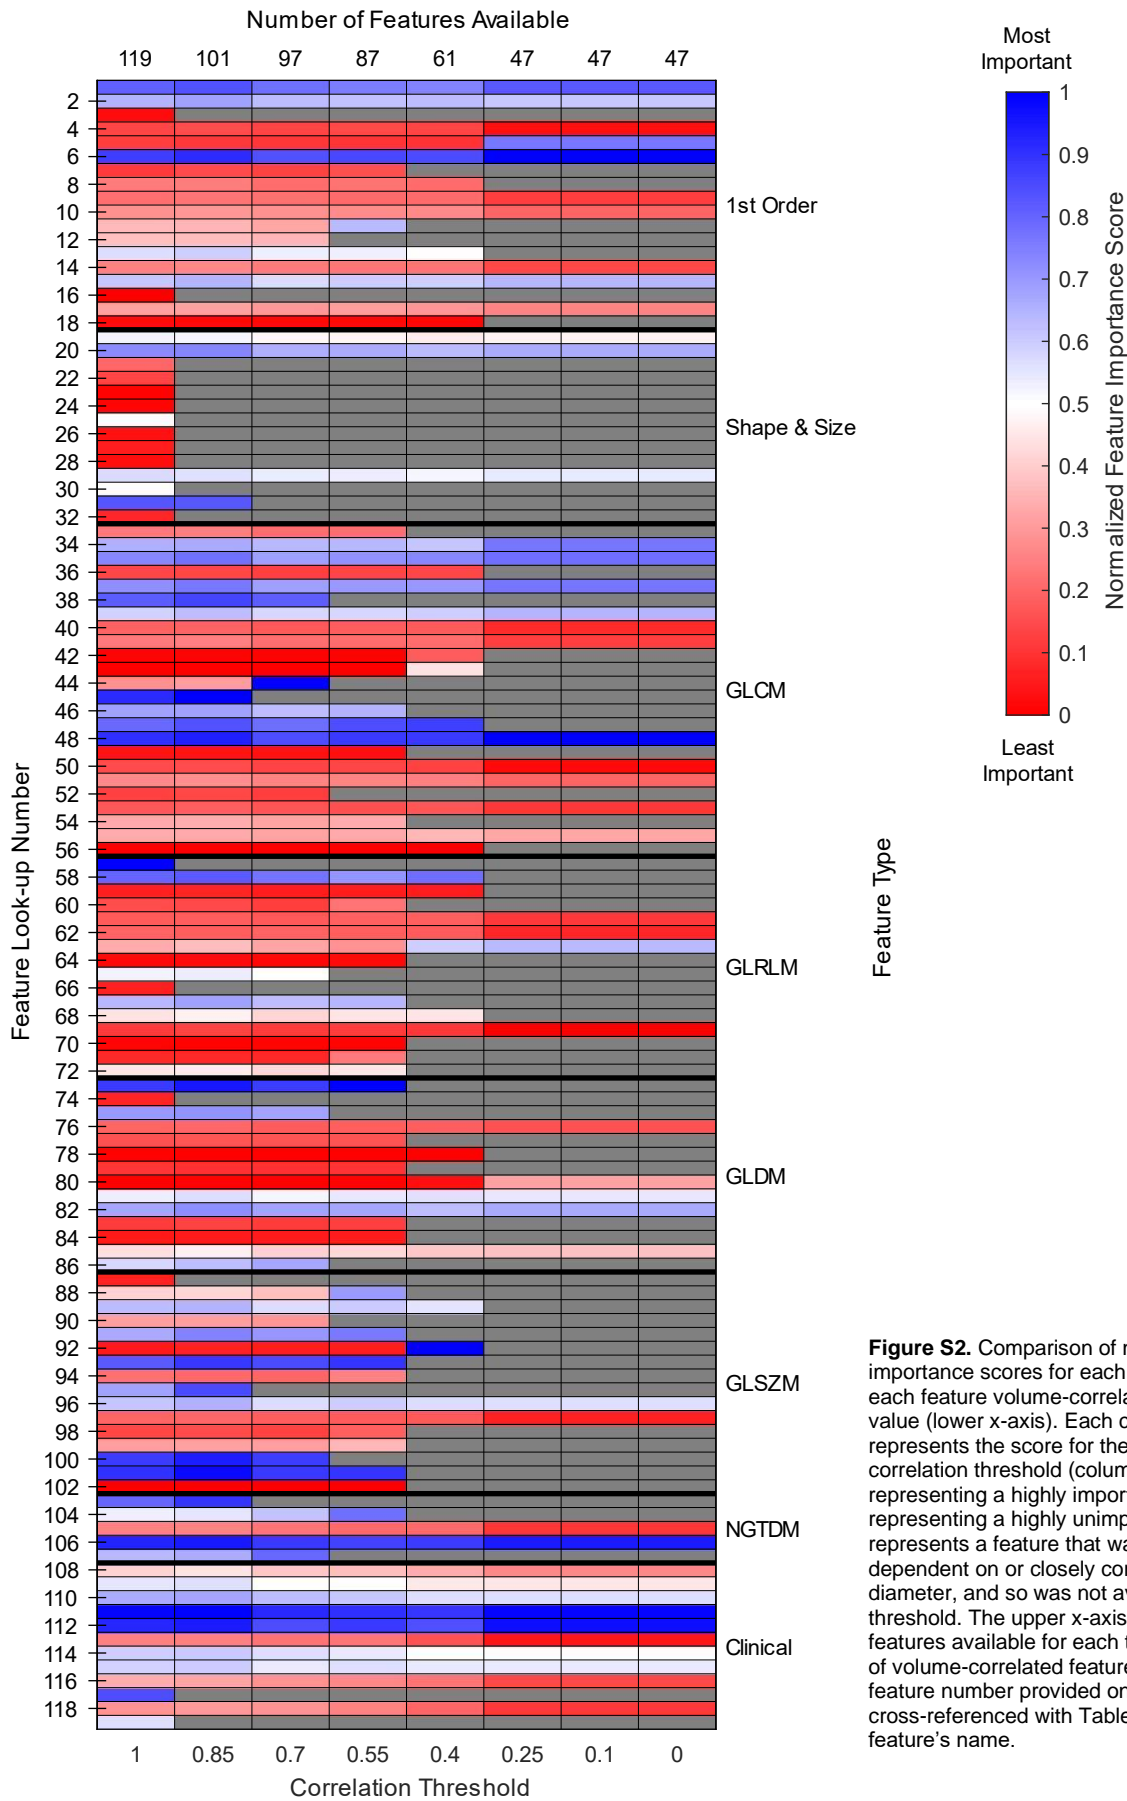

**Figure S2.** Comparison of normalized feature importance scores for each feature (y-axis) and for each feature volume-correlation coefficient threshold value (lower x-axis). Each colour-coded box represents the score for the given feature (row) and correlation threshold (column), with blue (1) representing a highly important feature and red (0) representing a highly unimportant feature. A grey box represents a feature that was removed due to it being dependent on or closely correlated to BM volume or diameter, and so was not available at a given threshold. The upper x-axis shows the number of features available for each threshold after the removal of volume-correlated features was performed. The feature number provided on the left y-axis can be cross-referenced with Table S1 to retrieve the given feature's name.

**Table S3.** Comparison of the normalized feature importance score and rank for all features with an importance score  $\geq 0.75$  for either correlation threshold = 1 (no features removed) or threshold = 0.25 (volume-correlated features removed). Shaded rows indicate features that were not highly important at threshold = 1, but became highly important at threshold = 0.25. Clinical features are underlined only to differentiate them more clearly against the radiomic features. The feature look-up number is provided to cross-reference this table with Figure S2, in which these look-up numbers correspond to the indices along the y-axis. Lastly, it should be noted that rows in this table are sorted according to the feature importance score/rank for correlation threshold = 0.25, and since the relative importance of the features changes at each threshold, the features are not in sorted order with respect to the threshold = 1 importance scores.

| Feature Look-up Number | Feature Type            | Feature Name                           | Correlation Threshold = 1<br>(No Feature Removal) |                 | Correlation Threshold = 0.25                                                                                                                      |                 |
|------------------------|-------------------------|----------------------------------------|---------------------------------------------------|-----------------|---------------------------------------------------------------------------------------------------------------------------------------------------|-----------------|
|                        |                         |                                        | Importance Score                                  | Importance Rank | Importance Score                                                                                                                                  | Importance Rank |
| 6                      | Radiomic – First Order  | Kurtosis                               | 0.878                                             | 10              | 1.000                                                                                                                                             | 1               |
| 48                     | Radiomic – GLCM         | Inverse Variance                       | 0.908                                             | 6               | 0.999                                                                                                                                             | 2               |
| 111                    | <u>Clinical</u>         | <u>Primary Cancer Site</u>             | 0.990                                             | 2               | 0.992                                                                                                                                             | 3               |
| 112                    | <u>Clinical</u>         | <u>Primary Cancer Histology</u>        | 0.926                                             | 4               | 0.972                                                                                                                                             | 4               |
| 106                    | Radiomic – NGTDM        | Contrast                               | 0.929                                             | 3               | 0.947                                                                                                                                             | 5               |
| 1                      | Radiomic – First Order  | 10 <sup>th</sup> Percentile            | 0.811                                             | 15              | 0.825                                                                                                                                             | 6               |
| 35                     | Radiomic – GLCM         | Cluster Shade                          | 0.736                                             | 19              | 0.784                                                                                                                                             | 7               |
| 34                     | Radiomic – GLCM         | Cluster Prominence                     | 0.654                                             | 28              | 0.769                                                                                                                                             | 8               |
| 37                     | Radiomic – GLCM         | Contrast                               | 0.720                                             | 21              | 0.768                                                                                                                                             | 9               |
| 5                      | Radiomic – First Order  | Interquartile Range                    | 0.122                                             | 90              | 0.767                                                                                                                                             | 10              |
| 57                     | Radiomic – GLRLM        | Gray-Level Non-Uniformity              | 1.000                                             | 1               | <i>No feature importance score available since these features were removed due to being volume-correlated at this correlation threshold value</i> |                 |
| 45                     | Radiomic – GLCM         | Inverse Difference Normalized          | 0.915                                             | 5               |                                                                                                                                                   |                 |
| 101                    | Radiomic – GLSZM        | Zone Percentage                        | 0.902                                             | 7               |                                                                                                                                                   |                 |
| 73                     | Radiomic – GLDM         | Dependence Entropy                     | 0.884                                             | 8               |                                                                                                                                                   |                 |
| 100                    | Radiomic – GLSZM        | Zone Entropy                           | 0.882                                             | 9               |                                                                                                                                                   |                 |
| 117                    | <u>Clinical</u>         | <u>GTV Volume</u>                      | 0.847                                             | 11              |                                                                                                                                                   |                 |
| 31                     | Radiomic – Shape & Size | Surface Volume Ratio                   | 0.832                                             | 12              |                                                                                                                                                   |                 |
| 93                     | Radiomic – GLSZM        | Large Area Low Gray-Level Emphasis     | 0.824                                             | 13              |                                                                                                                                                   |                 |
| 38                     | Radiomic – GLCM         | Correlation                            | 0.818                                             | 14              |                                                                                                                                                   |                 |
| 103                    | Radiomic – NGTDM        | Busyness                               | 0.803                                             | 16              |                                                                                                                                                   |                 |
| 58                     | Radiomic – GLRLM        | Gray-Level Non-Uniformity Normalized   | 0.800                                             | 17              |                                                                                                                                                   |                 |
| 47                     | Radiomic – GLCM         | Informational Measure of Correlation 2 | 0.795                                             | 18              |                                                                                                                                                   |                 |
